# Supplementary material for: A High-Throughput Screening-Compatible Strategy for the Identification of Inositol Pyrophosphate Kinase Inhibitors
Source: PLOS journal article supplement (doi:10.1371/journal.pone.0164378), 2016-10-13
Supplement: S6 (10.1371/journal.pone.0164378.s006) [file journal.pone.0164378.s006]

| Cluster name | Number of 5K library compounds within cluster | Inhibitors within cluster |
| --- | --- | --- |
| 1 | 4 | UNC10112561 |
| 2 | 35 | UNC10112646  UNC10112675 |
| 3 | 28 | UNC10225044  UNC10225045  UNC10225047 |
| 4 | 14 | UNC10225103 |
| 5 | 6 | UNC10225156 |
| 6 | 27 | UNC10225159 |
| 7 | 25 | UNC10225183 |
| 8 | 2 | UNC10225354 |
| 9 | 11 | UNC10225492  UNC10225493  UNC10225498 |
| 10 | 1 | UNC10225499 |
